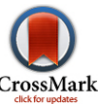

# Accounting for Imperfect Detection in Ecology: A Quantitative Review

Kenneth F. Kellner\*, Robert K. Swihart

Department of Forestry and Natural Resources, Purdue University, West Lafayette, Indiana, United States of America

## Abstract

Detection in studies of species abundance and distribution is often imperfect. Assuming perfect detection introduces bias into estimation that can weaken inference upon which understanding and policy are based. Despite availability of numerous methods designed to address this assumption, many refereed papers in ecology fail to account for non-detection error. We conducted a quantitative literature review of 537 ecological articles to measure the degree to which studies of different taxa, at various scales, and over time have accounted for imperfect detection. Overall, just 23% of articles accounted for imperfect detection. The probability that an article incorporated imperfect detection increased with time and varied among taxa studied; studies of vertebrates were more likely to incorporate imperfect detection. Among articles that reported detection probability, 70% contained per-survey estimates of detection that were less than 0.5. For articles in which constancy of detection was tested, 86% reported significant variation. We hope that our findings prompt more ecologists to consider carefully the detection process when designing studies and analyzing results, especially for sub-disciplines where incorporation of imperfect detection in study design and analysis so far has been lacking.

**Citation:** Kellner KF, Swihart RK (2014) Accounting for Imperfect Detection in Ecology: A Quantitative Review. PLoS ONE 9(10): e111436. doi:10.1371/journal.pone.0111436

**Editor:** Jeffrey Buckel, North Carolina State University, United States of America

**Received:** August 15, 2014; **Accepted:** October 2, 2014; **Published:** October 30, 2014

**Copyright:** © 2014 Kellner, Swihart. This is an open-access article distributed under the terms of the Creative Commons Attribution License, which permits unrestricted use, distribution, and reproduction in any medium, provided the original author and source are credited.

**Data Availability:** The authors confirm that all data underlying the findings are fully available without restriction. All relevant data are within the paper and its Supporting Information files.

**Funding:** Funding was provided by the Purdue University Graduate School and the Purdue Department of Forestry and Natural Resources. The funders had no role in study design, data collection and analysis, decision to publish, or preparation of the manuscript.

**Competing Interests:** The authors have declared that no competing interests exist.

\* Email: [kkellner@purdue.edu](mailto:kkellner@purdue.edu)

## Introduction

Measuring the abundance and distribution of organisms is a primary goal of ecology, conservation, and management [1]. These and related parameters (e.g. vital rates, species diversity) are essential to understanding population and metapopulation dynamics, community assembly, trophic interactions, conservation of threatened and endangered species, and the effects of management. Numerous advances in measuring these parameters have occurred over the past several decades, nearly all of which rely on counts and/or observations of organisms [2]. Unfortunately, in most cases complete counts (i.e., censuses) are impossible due to logistical constraints and the cryptic nature of many species [3]. Therefore, inference is based on a sample from the broader population of interest. Perfect or invariant detection is frequently assumed in count-based plant and animal studies [2]. Unfortunately, detection is rarely either perfect or constant due to observer error [4], species rarity [5] or because detection varies with confounding variables such as environmental conditions [6]. Regardless of its cause, we will refer to this condition henceforth as imperfect detection.

When detection is imperfect, additional steps are needed to improve inference. Failure to do so can result in biased estimation and erroneous conclusions. Numerous studies have demonstrated that detection varies among species, over time, and among habitats, and there may be serious consequences when this variability is ignored. For example, failure to correct for imperfect detection may result in bias in estimated relationships with

ecological covariates [6], [7], estimates of species distribution or abundance that are inaccurate or mask trends [8–11], improper selection of indicator species [12], and misinterpreted components of fitness such as size-dependent survival and senescence [13]. These errors can misinform management and policy and erode trust in ecologists.

Authors of several landmark papers in the past century have (1) alerted the scientific community to the harmful effects of imperfect detection and (2) designed experimental and statistical approaches that explicitly incorporate detection probability. Petersen [14] and Lincoln [15] recognized the limitations of simple counts and proposed a basic method to account for imperfect detection in abundance estimation using capture histories of marked organisms. Their approach laid the foundation for future methods of estimating abundance and survival based on marked animals including the Cormack-Jolly-Seber model [16–18], the robust design model [19], [20], and numerous others with increasing complexity and ability to account for variation in detection [21–24]. Recent advances have merged analysis of animal movement with capture-recapture, resulting in spatial capture-recapture models to estimate density and other parameters of interest [25], [26]. When identifying individual organisms is infeasible, repeated counts [27] [4], [28] and distance sampling [29] may be useful to account for detection when estimating abundance, as long as within-sample double-counting of individuals is avoided.

Other population and community metrics (occurrence/occupancy, local colonization and extinction, richness, diversity, and

turnover) can also be biased when imperfect detection is ignored [6], [30–32]. Methods exist to estimate these parameters while accounting for detectability, if data are collected in a way that allows the detection process to be modeled [1], [11], [31], [33–35]. This is often achieved through replicate surveys of sampling sites [31], [33], [34], [36] although other methods such as the collection of times to detection are also possible [37], [38]. Software packages have been developed to make the modeling advances described above more accessible to ecologists, including programs CAPTURE [39], MARK [40], DISTANCE [41], PRESENCE [42], COMDYN [43], and E-Surge [44], as well as numerous R packages including ‘marked’ [45] ‘unmarked’ [46] and ‘secr’ [47]. Recently, Bayesian modeling approaches have been introduced to ecologists as an alternative means of fitting complex population and community models [1], [26], [48–51].

Despite numerous articles alerting ecologists to the consequences of imperfect detection, and despite available models and software capable of addressing imperfect detection, we commonly encounter refereed publications that fail to acknowledge or account for the presence of non-detection error. These casual observations beg the question: how prevalent are methods that incorporate imperfect detection in the ecological literature, and how does this differ among various types of studies and over time? Identifying these patterns is crucial to understand barriers to incorporation of imperfect detection and to target areas in which ecological inference might be improved.

We posited that the expanding availability of analysis methods, software, and computing power has increased the probability that, over time, researchers account for imperfect detection. We suspected that adoption has varied among areas of ecological inquiry (e.g. [10], [52]), so we asked whether the probability of accounting for imperfect detection has varied with the type of organism studied, the level of biological organization studied, or the spatial scale studied. Because of the taxonomic focus of many of the researchers who have developed methods for addressing imperfect detection, we predicted that a greater proportion of studies focused on fish, mammals, and birds would incorporate imperfect detection than other groups (e.g. plants, invertebrates); however we expected this difference to have declined over time. We also predicted that studies conducted at higher levels of organization (e.g. communities vs. individual animals) and with greater spatial extents (e.g. regional or landscape vs. local) would be less likely to incorporate imperfect detection due to the difficulties of implementing more complex study designs with limited resources. To test our predictions, we conducted a quantitative review of ecological literature spanning 40 years, 6 taxonomic groups, 5 commonly reported parameters, 2 levels of biological organization, and 3 spatial scales to determine how the use of statistical methods that incorporate imperfect detection has varied among these variables and over time.

## Materials and Methods

### Article Selection

A census of the literature was impractical, so we adopted a stratified sampling approach (Figure 1). We selected a subset of 10 journals to include in the study, chosen for their impact factors, long publication history, and coverage of a range of taxonomic groups (birds, fish, mammals, herpetofauna, invertebrates, and plants; Table 1). For each of the journals, we selected 5 years from which to sample papers: 1971, 1981, 1991, 2001, and 2011.

Within each journal/year combination, we examined all articles (starting in the first issue), identifying those that fit our criteria for inclusion through careful reading of the abstract, methods, and

results. Three criteria were defined: (1) the study had to be focused on one or more of the target taxonomic groups; (2) the study had to measure one or more of a set of parameters of interest, composed of abundance, occurrence, survival, richness or diversity, and extent or size of species range (selected because they are among those most often studied by ecologists and susceptible to the biases of imperfect detection); (3) the study had to be implemented in a way in which detection was likely imperfect, i.e., there was no evidence to support the feasibility of a complete census or to ensure constancy of detection. If fewer than 15 articles were selected in a given journal/year combination, we continued our search into the following year(s) until we had a minimum of 15 articles that fit the criteria.

### Data Collection

We recognized that our ability to correctly judge whether a study incorporated imperfect detection was likely less than perfect itself. We therefore implemented a replicated sampling approach commonly used as a means of parameter estimation when detection is imperfect. The objectives, methods, results, and discussion of each article were carefully read by the first author (KFK). The journal type (single-taxon focus vs. broader focus) year, taxa and parameters measured, experimental scale (population or community level), and spatial extent (local or landscape) were recorded for each article, as well as the presence/absence of an approach to account for imperfect detection. For the binary response variable, the presence of an approach included a statistical method of estimating detectability or an acknowledgment by the authors of imperfect detection as a potential issue. Articles that accounted for imperfect detection were further examined to determine (1) if they explicitly reported detection probabilities and (2) if and how detection varied (e.g. over time or among species). The second author (RKS) independently read and scored a subset of all articles in the same manner. Multiple “sampling occasions” for this subset of articles allowed for estimation of a detection parameter, analogous to a repeated-sample design for occupancy estimation [1], [31]. The approach we used assumes that there are no “false positives”, i.e., studies identified as accounting for imperfect detection when in truth they did not. We took a conservative approach to identifying studies that accounted for imperfect detection and believe false positives were negligible. Information about all articles included in the quantitative review is contained in the Dataset S1.

### Analysis

Using this repeated-sample data, we simultaneously modeled the probability that an article incorporated imperfect detection (hereafter  $p_{IID}$ ) and the probability that we were able to detect this when reading the articles (hereafter  $p_R$ ) using a hierarchical logistic regression model [1]. Year of publication, journal type, taxon and parameter(s) measured, scale, and spatial extent were considered as covariates on  $p_{IID}$ . Taxon and reader (KFK or RKS) were considered as covariates on  $p_R$ . In addition to the full model, we fit separate models for each taxon; these models did not have taxa as predictor variables but were otherwise identical to the full model. We explored models with interacting effects; however, finding no significant interactions, our final models included only additive effects. Models were fit in a Bayesian framework using JAGS [53], called from R [54] using the package R2jags [55]. We used two methods for assessing the statistical importance of each covariate in the models. First, we calculated a 95% credible interval for each parameter estimate based on the posterior distribution. Second, we calculated a parameter  $f$  representing the fraction of the sampled posterior distribution with the same sign as

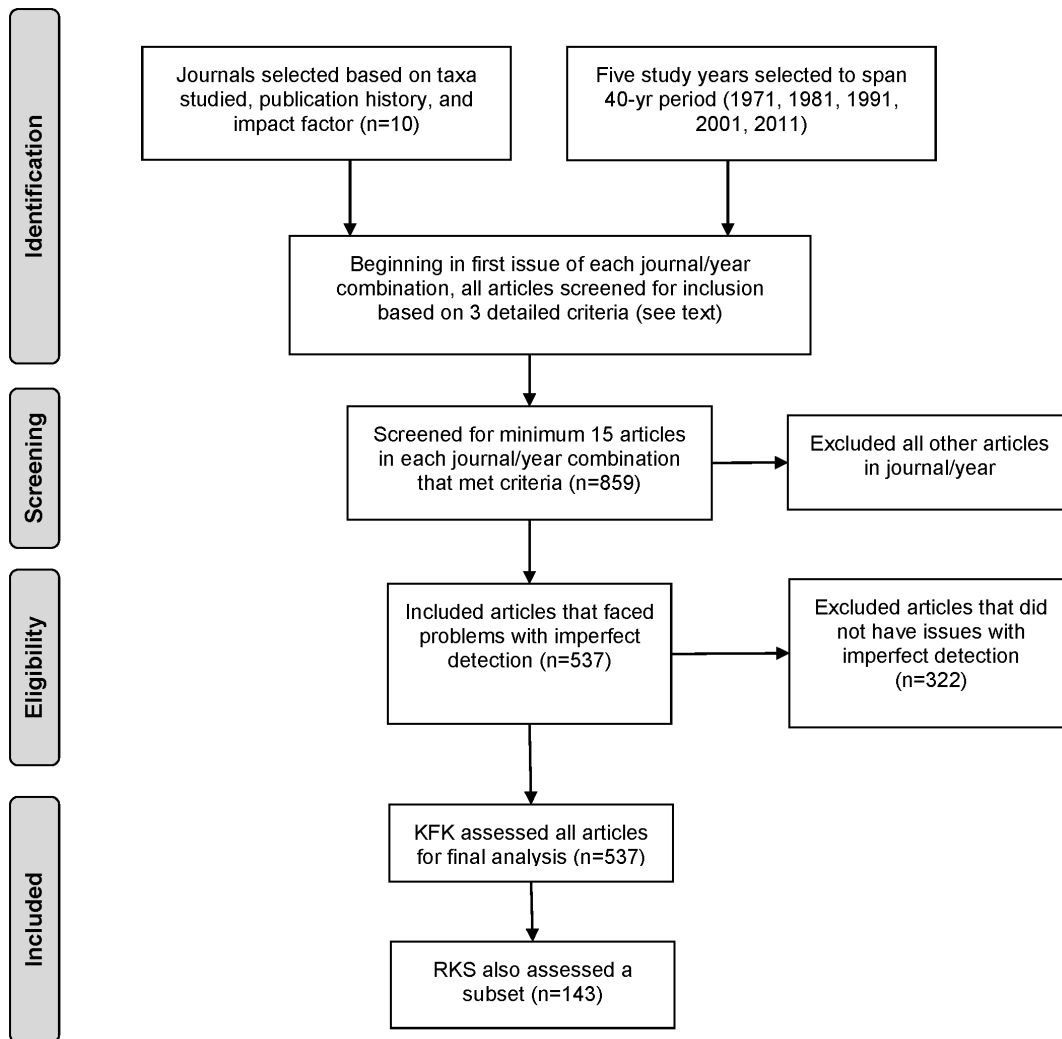

**Figure 1. PRISMA flow diagram detailing how articles were selected for inclusion in the quantitative literature review.**  
doi:10.1371/journal.pone.0111436.g001

**Table 1.** Selected characteristics of the 10 journals included in a quantitative review examining use of methods that incorporate imperfect detection in wildlife and plant studies.

| Journal Name                                   | Taxa                 | Years Published | Impact Factor |
|------------------------------------------------|----------------------|-----------------|---------------|
| Journal of Ecology                             | Plants               | 1913-           | 5.04          |
| Journal of Animal Ecology                      | Multiple             | 1932-           | 4.94          |
| Ecology                                        | Multiple             | 1920-           | 4.85          |
| Journal of Biogeography                        | Multiple             | 1974-           | 4.54          |
| Ecological Entomology                          | Invertebrates        | 1836-           | 1.95          |
| The Auk                                        | Birds                | 1884-           | 1.81          |
| Journal of Mammalogy                           | Mammals              | 1919-           | 1.74          |
| Transactions of the American Fisheries Society | Fish                 | 1872-           | 1.55          |
| Journal of Wildlife Management                 | Multiple             | 1937-           | 1.36          |
| Herpetologica                                  | Reptiles, Amphibians | 1936-           | 1.08          |

Journals were chosen for inclusion in the review on the basis of taxonomic groups studied, years published, and impact factor (from Journal Citation Reports 2011–2012).

doi:10.1371/journal.pone.0111436.t001

the mean; this value reflects our level of certainty that the parameter estimate is positive or negative.

## Results

A total of 537 articles surveyed by KFK fit the criteria and were included in the review. A subset ( $n = 143$ , 27%) was also examined by RKS. The most common parameters estimated were abundance ( $n = 377$  articles), occupancy/occurrence ( $n = 121$ ) and richness ( $n = 103$ ), whereas survival ( $n = 66$ ) and species range/distribution ( $n = 31$ ) were less common. Birds ( $n = 154$ ), invertebrates ( $n = 150$ ), and mammals ( $n = 131$ ) were the most commonly studied taxa.

Overall,  $23\% \pm 1.8$  (123/537, mean  $\pm$  standard error) of articles addressed imperfect detection. There was a positive effect of year on  $p_{IID}$  ( $f = 0.99$ , Table 2): the yearly mean percent of articles that addressed imperfect detection generally increased from  $25\% \pm 5.9$ ,  $14\% \pm 4.0$ , and  $23\% \pm 4.6$  in 1971, 1981, and 1991, respectively, to  $29\% \pm 5.1$  and  $35\% \pm 5.1$  in 2001 and 2011. The same increasing trend over time appeared when taxa were modeled separately, with the exception of fish and plant articles (Figure 2, Table 3). Taxonomic group generally was an important covariate on  $p_{IID}$ . Specifically, studies of fish were more likely ( $f = 0.97$ ) to account for imperfect detection than the average ( $43\% \pm 5.9$  of articles for fish vs.  $23\% \pm 1.8$  overall). In contrast, articles focused on plants ( $f = 0.99$ ) and invertebrates ( $f = 0.95$ ) were less likely to do so ( $1.4\% \pm 1.3$  and  $9.0\% \pm 2.7$ , respectively; Table 2). The remaining taxonomic groups (mammals, herpetofauna, and birds) were positively related to  $p_{IID}$ , but with a lesser degree of certainty (Table 2). Articles in journals that focused on a single taxon were less likely ( $f = 0.98$ ) to incorporate imperfect detection than multi-taxon journals.

The parameter(s) estimated in each article also correlated with  $p_{IID}$ . Articles that measured survival were more likely ( $f = 1.00$ ) to incorporate imperfect detection than the mean ( $50\% \pm 6.1$  vs.  $23\% \pm 1.8$ ); abundance was also positively related to  $p_{IID}$  (Table 2). In contrast, papers that measured richness, occur-

rence/occupancy, and range/distribution were less likely to incorporate imperfect detection ( $6.0\% \pm 2.3$ ,  $10\% \pm 2.8$ , and  $3.2\% \pm 3.2$ ; Table 2). Articles examining entire communities were less likely to incorporate imperfect detection than studies focused on a single species ( $f = 0.95$ , Table 2). Spatial scale, in contrast, did not affect  $p_{IID}$  ( $f = 0.67$ , Table 2). The effects of parameters and scale on  $p_{IID}$  were similar when taxonomic groups were modeled separately, with the exception of a positive effect of community studies on  $p_{IID}$  for bird studies (Table 3).

The parameter  $p_R$  did not differ between taxonomic groups. There was an observer effect, but it was small (Table 2). Just 10 of 143 papers ( $7\% \pm 2.1$ ) examined by both readers had different assessments for the inclusion of imperfect detection.

Among articles that accounted for imperfect detection, 62 (50%) also reported information about detection probabilities in some form. Of these, 48%, 33% and 19% reported *maximum* estimated single-survey detection probabilities (i.e., probability of detection on a single sampling occasion) less than 0.7, 0.5, and 0.3, respectively. Most papers reported at least one detection probability significantly less than 1; 70% had at least one estimated detection probability less than 0.5, and 50% had at least one less than 0.3. Reported detection probabilities varied with at least one covariate in 86% of papers that tested for heterogeneity; the most common covariates were time (44%), species (25%), site or population (19%), and methodology (e.g. effort, observer effects; 19%).

## Discussion

### Taxonomic Groups

Our examination of ecology papers across 5 decades, 10 journals, 5 taxa, and other parameters of interest confirmed our initial observations: the majority (77%) of ecological studies failed to acknowledge or correct for imperfect detection when doing so likely would have been appropriate. As we predicted, there was considerable contrast among taxa: vertebrates (fish, mammals, birds, reptiles and amphibians) were more likely to account for

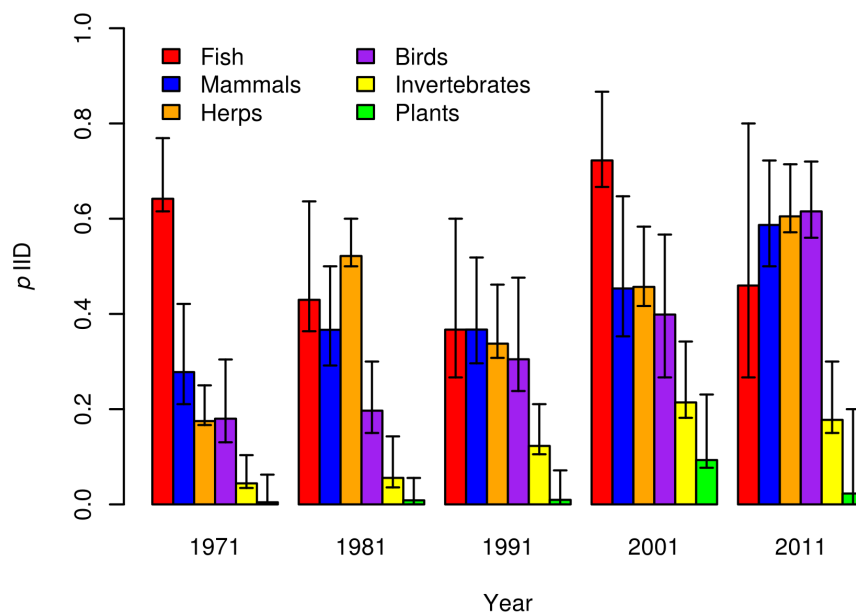

**Figure 2. Mean estimated probability ( $p_{IID}$ ) that an article of a given taxon and year incorporated statistical methods to account for imperfect detection, based on output from the hierarchical logistic regression model.** Error bars represent 95% credible intervals around the mean.

doi:10.1371/journal.pone.0111436.g002

**Table 2.** Estimated parameter values from a hierarchical logistic regression relating covariates (taxa, parameter estimated, year, journal type, and experimental scale) on the probability a given study accounted for imperfect detection.

| Parameter                       | Estimate                | 95% Credible Interval | $f^b$ |
|---------------------------------|-------------------------|-----------------------|-------|
| Year                            | <b>0.45<sup>a</sup></b> | (0.23, 0.66)          | 0.99  |
| Fish                            | <b>1.01</b>             | (0.01, 2.13)          | 0.97  |
| Mammals                         | 0.38                    | (−0.51, 1.49)         | 0.75  |
| Herps                           | 0.53                    | (−0.38, 1.50)         | 0.85  |
| Birds                           | 0.33                    | (−0.70, 1.22)         | 0.76  |
| Invertebrates                   | −0.83                   | (−1.83, 0.16)         | 0.95  |
| Plants                          | <b>−1.70</b>            | (−2.95, −0.35)        | 0.99  |
| Abundance                       | 0.49                    | (−0.26, 1.18)         | 0.90  |
| Occurrence                      | −0.60                   | (−1.42, 0.14)         | 0.95  |
| Survival                        | <b>0.91</b>             | (0.23, 1.65)          | 1.00  |
| Richness                        | <b>−1.10</b>            | (−1.81, −0.25)        | 0.99  |
| Range                           | −0.92                   | (−2.17, 0.22)         | 0.94  |
| Scale (1 = community)           | −0.51                   | (−1.10, 0.08)         | 0.95  |
| Spatial extent (1 = landscape)  | −0.12                   | (−0.69, 0.45)         | 0.67  |
| Journal type (1 = single taxon) | <b>−0.60</b>            | (−1.12, −0.03)        | 0.98  |
| <i>Detection Covariates</i>     |                         |                       |       |
| Observer (1 = RKS)              | <b>1.33</b>             | (0.16, 2.51)          | 0.98  |
| Fish                            | −0.02                   | (−1.37, 1.51)         | 0.52  |
| Mammals                         | −0.68                   | (−2.02, 0.52)         | 0.85  |
| Herps                           | 0.83                    | (−0.52, 2.36)         | 0.85  |
| Birds                           | −0.62                   | (−1.80, 0.64)         | 0.84  |
| Invertebrates                   | −0.14                   | (−1.70, 1.48)         | 0.57  |
| Plants                          | −0.21                   | (−2.35, 1.77)         | 0.55  |

<sup>a</sup>Bolded parameters had 95% credible intervals that did not overlap 0 and are considered statistically important.

<sup>b</sup>Proportion of the parameter's posterior distribution with same sign as the mean value; values approaching 1 reflect increasing certainty that the parameter is different from 0.

doi:10.1371/journal.pone.0111436.t002

imperfect detection than other taxa (plants and invertebrates). The earliest proponents of accounting for imperfect detection (e.g. [14], [15]) focused on vertebrates. The generally lower overall abundance, greater movement capability, and cryptic nature of vertebrates, relative to plants and invertebrates, may have encouraged earlier adoption by vertebrate ecologists of study designs and statistical methods to correct for limitations of sampling and detection. Many of these methods were published in taxon-specific journals or tailored to specific taxa (e.g. removal sampling of fish or mark-release-recapture of mammals and birds), so their adaptation to studies of other taxa was likely limited. Interestingly, single-taxon journals actually had a lower proportion of studies incorporate imperfect detection, likely reflecting the small number of studies in plant- and invertebrate-focused journals that did so.

The proportion of studies that accounted for imperfect detection increased over the 40-year period of our review for all vertebrate taxa except fish, which had a comparatively high proportion throughout (Figure 2). This positive trend presumably reflects greater awareness among vertebrate ecologists of the risks associated with failing to account for imperfect detection and a correspondingly greater availability of sampling and statistical methods designed specifically to account for errors of omission. While we did not collect detailed data on the specific statistical method(s) used to account for imperfect detection, we observed a corresponding generally positive trend in the diversity of statistical

approaches used over time. Early studies (prior to 1981) of fish and mammals primarily used simple mark-release-recapture methods like the Lincoln-Peterson index [14], [15]. From 1981–2001 more complex mark-release-recapture methods [16–18] were most commonly used, but methods were still focused on specific taxa (primarily mammals and fish). From 2001 onward, the diversity of approaches greatly increased for most taxa thanks to the widespread introduction of occupancy modeling and related hierarchical modeling approaches applicable to wide variety of species [1], [31], [33], [36].

While the trend over time in adoption of methods that incorporate imperfect detection is less pronounced for plants and invertebrates (Figure 2), it is nevertheless positive and likely will continue as publications on these taxa draw attention to the issue [3], [56–59]. For example, [10] estimated detection probability for plants surveyed in the Swiss Biodiversity Monitoring program. Based on a random sample of 100 species (of 1700 detected), median single-survey detection probability was 0.74 (range 0.03–0.99) for the spring survey and 0.82 (range 0.03–0.99) for the late summer survey. Thus, distribution maps based on a single survey risk modeling the joint patterns of occurrence and detection. These two parameters potentially could be disentangled if they rely on covariates that are not identical and sample sizes are reasonably large [60], but these constraints suggest that researchers should use caution in making inferences from a single survey.

**Table 3.** Estimated parameter values (with 95% credible intervals in parentheses) from a series of hierarchical logistic regressions (separated by taxa) relating covariates (parameter estimated, year, journal type, and experimental scale) on the probability a given study accounted for imperfect detection.

| Parameter                       | Taxon               |                                      |                          |                            |                          |                     |
|---------------------------------|---------------------|--------------------------------------|--------------------------|----------------------------|--------------------------|---------------------|
|                                 | Fish                | Mammals                              | Herps                    | Birds                      | Inverts                  | Plants              |
| Year                            | -0.19 (-0.66, 0.22) | <b>0.60<sup>a</sup></b> (0.12, 1.16) | <b>0.44</b> (0.02, 1.01) | <b>0.79</b> (0.32, 1.30)   | <b>0.54</b> (0.08, 1.07) | 0.18 (-1.00, 1.68)  |
| Abundance                       | 0.51 (-0.83, 1.95)  | <b>1.31</b> (0.09, 2.64)             | 0.38 ((-0.82, 1.69)      | 0.55 (-0.76, 2.00)         | -0.67 (-1.99, 0.62)      | 0.08 (-1.84, 1.95)  |
| Occurrence                      | -0.34 (-1.83, 1.20) | -0.20 (-1.62, 1.22)                  | -0.11 (-1.44, 1.21)      | -1.05 (-2.38, 0.18)        | -0.99 (-2.43, 0.27)      | -0.15 (-1.89, 1.68) |
| Survival                        | 1.17 (-0.34, 2.63)  | 0.09 (-1.23, 1.37)                   | 0.55 (-0.84, 1.80)       | <b>1.33</b> (0.09, 2.74)   | 1.09 (-0.38, 2.49)       | -0.06 (-1.92, 1.81) |
| Richness                        | -0.58 (-2.08, 0.92) | -0.42 (-1.87, 1.22)                  | -0.98 (-2.72, 0.49)      | -1.05 (-2.33, 0.11)        | -0.16 (-1.31, 1.13)      | -0.18 (-2.20, 1.69) |
| Range                           | -0.53 (-2.36, 1.17) | -0.53 (-2.35, 1.17)                  | -0.77 (-2.41, 0.85)      | 0.23 (-1.93, 0.15)         | -0.45 (-2.17, 1.38)      | -0.07 (-1.90, 1.69) |
| Scale (1 = community)           | 0.22 (-0.79, 1.27)  | -0.55 (-1.60, 0.45)                  | -0.25 (-1.51, 1.08)      | <b>1.27</b> (-2.46, -0.16) | -0.68 (-1.95, 0.61)      | -0.52 (-2.51, 1.44) |
| Spatial extent (1 = landscape)  | 0.44 (-0.69, 1.65)  | -0.77 (-1.98, 0.43)                  | -0.62 (-1.89, 0.46)      | 0.05 (-1.16, 1.30)         | -0.10 (-1.36, 1.13)      | -0.40 (-2.29, 1.65) |
| Journal type (1 = single taxon) | 0.08 (-1.08, 1.14)  | -0.78 (-1.79, 0.34)                  | 0.05 (-1.20, 1.27)       | -0.79 (-1.93, 0.15)        | -0.03 (-1.18, 1.27)      | 0.12 (-1.75, 2.02)  |
| <i>Detection covariates</i>     |                     |                                      |                          |                            |                          |                     |
| Observer (1 = RKS)              | 0.64 (-1.15, 1.22)  | 0.01 (-2.22, 1.79)                   | 0.23 (-1.43, 1.89)       | 0.01 (-2.13, 2.16)         | 0.08 (-1.83, 1.99)       | -0.12 (-1.99, 1.62) |

<sup>a</sup>Bolded parameters had 95% credible intervals that did not overlap 0 and are considered statistically important.

doi:10.1371/journal.pone.0111436.t003

## Parameters Estimated

Each parameter measured in ecological studies presents unique logistical and statistical challenges. For example, estimating survival inherently requires marking individuals and following them through time, with collected data likely including multiple sampling events. Correcting for imperfect detection is a logical extension when these data are available, and the majority of survival studies did so. Important exceptions include survival studies that do not correct for conflation of non-detection with mortality, in which case an individual that is not detected at a given sampling occasion is assumed to be dead. The relatively high proportion of abundance studies that accounted for imperfect detection likely reflects a long history and proliferation of approaches to account for undetected individuals in abundance estimates [2], [61]. A notable exception to this pattern is the widespread use of “catch per unit effort” (CPUE) and similar metrics as indices of abundance. CPUE does not require marked organisms but implicitly assumes that detectability does not vary across time or experimental site, which has been shown to introduce bias into estimation [22], [62], [63].

Richness, occurrence, and range are closely related parameters. Richness can be represented as the sum of all species' occurrences at a site, and range loosely corresponds to species occurrence across a large geographic area. They shared an additional characteristic in our study – a low probability of incorporating imperfect detection. Estimating these parameters (especially at the community scale) can require sampling for many species at numerous sites, requiring potentially difficult or costly repeated samples and/or careful allocation of sampling effort to obtain the data necessary to estimate detection. In addition, sampling designs and statistical methods that incorporate imperfect detection into estimation of occupancy and richness have appeared in the ecological literature only recently [31], [33], [34], [36]. For estimates of species range and distribution, a further issue is that researchers often have relied on historical presence-only data (e.g. from museum collections) which makes estimation of occupancy probability and subsequent inferences difficult [64] but not impossible [65–67], at least in a relative sense [68].

## Implications

We concede that it is impossible to know the extent of bias in past studies that have ignored imperfect detection. It certainly is possible that bias may have been small in some of the studies that failed to incorporate detection error, because detection probability was either high or invariant. However, for the subset of papers in our study that estimated detection probability, the median values of minimum and maximum single-survey detectability were 0.29 and 0.71, respectively, and 70% had at least one estimated detection probability less than 0.5, an indication that detection can commonly be much less than perfect. Admittedly, these studies are not a random subset of the studies we considered, as their authors presumably considered imperfect detection to be problematic in their study system. Still, the magnitude and frequency of bias seen in these and other studies (e.g. [6–13]) suggests strongly that imperfect detection is common and can weaken inference for many types of ecological processes. For example, simulations have demonstrated that ignoring imperfect detection, as is done with presence-absence and presence-only data, can dramatically diminish a model's capacity to identify environmental correlates of species distributions [32].

Even if detection is imperfect, bias may not affect inference adversely for some purposes if detection is invariant. For instance, population indices are commonly used to monitor trends and assume constant detectability relative to abundance [69], [70], even though evidence of variation is common [71] and led [72] to recommend that the burden of proof should be shifted to demonstrate that detection probability is invariant. Our results provide support and warrant expansion of their recommendation; in 86% of papers from our study that examined the constancy assumption, detectability varied significantly. Rather than assume that detection is perfect, it seems prudent, then, for field ecologists to assume that detection probabilities differ and to require evidence of their equivalence before using indices or other measures that conflate this nuisance parameter with the parameter(s) of ecological interest.

Collectively, our findings should concern ecologists in search of stronger inference, and particularly managers and policy makers whose decisions often depend on accurate knowledge of species

presence or abundance. Accounting for imperfect detection has been the exception and not the rule in ecology across most sub-disciplines and study types. We hope the patterns we have identified will encourage ecologists to consider carefully the detection process when designing studies and analyzing results. This is particularly important with taxonomic groups and parameters we highlighted that, in the past, have generally not accounted for imperfect detection.

We recognize that the methods developed thus far to deal with imperfect detection are not a panacea for estimation. For instance, methods to address imperfect detection, as with all estimation approaches, rely on assumptions that need to be carefully evaluated and may not be suitable for certain species or systems (e.g., [73], [74]). Further, addressing imperfect detection will not solve other forms of hidden bias that can afflict observational studies [75]. But we disagree with the suggestion that ignoring imperfect detection may be preferable to accounting and adjusting for it [76], [77]. We believe that a more suitable approach to improved estimation is to minimize bias associated with model assumptions generally, including the issue of detection, by careful consideration of study design, data collection, and statistical analysis [78]. Using hierarchical occupancy models as an example, [78] showed that, in virtually all realistic cases, accounting for detectability reduces the bias in the estimation of occupancy relative to naïve models even when detectability is heterogeneous. Of course reliable inference depends on sampling methods that produce reasonable odds of detection given presence; no estimator will be particularly helpful when applied to data on populations or species that are “invisible” to sampling [79].

We restricted our quantitative review to a subset of ecological parameters in which imperfect detection may play an important role. But there certainly are other parameters of ecological interest for which inference may be improved by accounting for imperfect detection. For example, most studies of seed dispersal by animals

have ignored the implications of seeds that were undetected (but see [80]). Recently, though, methods of varying complexity have been developed to account for the effects of imperfect detection on estimates of seed dispersal and survival [81–83]. In general, the current proliferation of detection methods [84–86] and statistical techniques for modelling detectability [1], [26], [49] are applicable to a wide range of taxonomic groups, parameters, and experimental scales and present an unprecedented opportunity for ecologists to provide more robust estimation and inference.

## Supporting Information

**Dataset S1** Articles included in the literature review. A spreadsheet containing information about papers included in this quantitative literature review, including file names, journals, taxa studied, parameters estimated, and other related values. Detailed metadata are included in the spreadsheet. (XLSX)

**Checklist S1** PRISMA Summary details and locations within the text of specific components of the systematic review conducted in this paper, based on the 2009 PRISMA group guidelines. (DOCX)

## Acknowledgments

Roxanne Pourshoushtari compiled the papers included in this review. Nate Lichti, Rita Blythe, Mekala Sundaram, Tim Smyser, Byju Govindan, and two anonymous reviewers provided helpful comments on the manuscript.

## Author Contributions

Conceived and designed the experiments: KFK RKS. Performed the experiments: KFK RKS. Analyzed the data: KFK. Contributed reagents/materials/analysis tools: KFK RKS. Contributed to the writing of the manuscript: KFK RKS.

## References

- Royle JA, Dorazio RM (2008) Hierarchical modeling and inference in ecology. Burlington, MA: Elsevier Academic Press. 464 p.
- Williams B, Nichols JD, Conroy M (2002) Analysis and management of animal populations. San Diego, CA: Elsevier Academic Press. 817 p.
- MacKenzie DI, Nichols JD, Sutton N (2005) Improving inferences in population studies of rare species that are detected imperfectly. *Ecology* 86: 1101–1113.
- Nichols JD, Hines JE, Sauer JR, Fallon FW, Fallon JE, et al. (2000). A double-observer approach for estimating detection probability and abundance from point counts. *Auk* 117: 393–408.
- Dettmers R, Buehler DA, Bartlett JG, Klaus NA (1999) Influence of point count length and repeated visits on habitat model performance. *J Wildl Manage* 63: 815–823.
- Gu W, Swihart RK (2004) Absent or undetected? Effects of non-detection of species occurrence on wildlife-habitat models. *Biol Conserv* 116: 195–203.
- Zipkin EF, Royle JA, Dawson DK, Bates S (2010) Multi-species occurrence models to evaluate the effects of conservation and management actions. *Biol Conserv* 143: 479–484.
- Kéry M, Schmidt BR (2008) Imperfect detection and its consequences for monitoring for conservation. *Community Ecol* 9: 207–216.
- Buckland ST, Studeny AC, Magurran AE, Newson SE (2011) Biodiversity monitoring: the relevance of detectability. In: Magurran AE, McGill BJ, editors. *Biological diversity: frontiers in measurement and assessment*. Oxford: Oxford University Press. 25–36.
- Chen G, Kéry M, Plattner M (2013) Imperfect detection is the rule rather than the exception in plant distribution studies. *J Ecol* 101: 183–191.
- Tingley MW, Beissinger SR (2013) Cryptic loss of montane avian richness and high community turnover over 100 years. *Ecology* 94: 598–609.
- Urban NA, Swihart RK, Malloy MC, Dunning JB Jr (2012) Improving selection of indicator species when detection is imperfect. *Ecol Indic* 15: 188–197.
- Gimenez O, Viallefont A, Charmantier A, Pradel R, Cam E, et al. (2008) The risk of flawed inference in evolutionary studies when detectability is less than one. *Am Nat* 172: 441–448.
- Petersen CG (1896) The yearly immigration of young plaice into the Limfjord from the German Sea. Report of the Danish Biological Station 6: 1–48.
- Lincoln FC (1930) Calculating waterfowl abundance on the basis of banding returns. Washington, DC: US Department of Agriculture. Circular No.118.
- Cormack RM (1964) Estimates of survival from the sighting of marked animals. *Biometrika* 51: 429–438.
- Jolly GM (1965) Explicit estimates from capture-recapture data with both death and immigration-stochastic model. *Biometrika* 52: 225–247.
- Seber GAF (1965) A note on the multiple-recapture census. *Biometrika* 52: 249–259.
- Pollock KH (1982) A capture-recapture design robust to unequal probability of capture. *J Wildl Manage* 46: 752–757.
- Pollock KH, Nichols JD, Brownie C, Hines JE (1990) Statistical inference for capture-recapture experiments. *Wildl Monogr* No.107.
- Otis DL, Burnham KP, White GC, Anderson DR (1978) Statistical inference from capture data on closed animal populations. *Wildl Monogr* 62: 1–135.
- Nichols JD, Pollock KH (1983) Estimation methodology in contemporary small mammal capture-recapture studies. *J Mammal* 64: 253–260.
- Royle JA, Young KV (2008) A hierarchical model for spatial capture-recapture data. *Ecology* 89: 2281–2289.
- Royle JA, Dorazio RM (2012) Parameter-expanded data augmentation for Bayesian analysis of capture-recapture models. *J Ornithol* 152: 521–537.
- Ergon T, Gardner B (2014). Separating mortality and emigration: modelling space use, dispersal, and survival with robust-design spatial capture-recapture data. *Methods Ecol Evol*, doi:10.1111/2041-210X.12133.
- Royle JA, Chandler RB, Sollmann R, Gardner B (2014) *Spatial capture-recapture*. Waltham, MA: Elsevier Academic Press. 612 p.
- Caughley G, Goddard J (1972) Improving the estimates from inaccurate censuses. *J Wildl Manage* 36: 135–140.
- Royle JA (2004) *N*-mixture models for estimating population size from spatially replicated counts. *Biometrics* 60: 108–115.
- Buckland ST, Anderson DR, Burnham KP, Laake JL (1993) *Distance sampling: estimating abundance of biological populations*. London: Chapman and Hall. 446 p.
- Boulinier T, Nichols JD, Sauer JR, Hines JE, Pollock KH (1998) Estimating species richness: the importance of heterogeneity in species detectability. *Ecology* 79: 1018–1028.
- MacKenzie DI, Nichols JD, Hines JE, Knutson MG, Franklin AB (2003) Estimating site occupancy, colonization, and local extinction when a species is detected imperfectly. *Ecology* 84: 2200–2207.

32. Lahoz-Monfort JJ, Guillera-Arroita G, Wintle BA (2014) Imperfect detection impacts the performance of species distribution models. *Glob Ecol Biogeogr* 23: 504–515.
33. MacKenzie DI, Nichols JD, Lachman GB, Droege S, Royle JA, et al. (2002) Estimating site occupancy rates when detection probabilities are less than one. *Ecology* 83: 2248–2255.
34. Dorazio RM, Royle JA, Söderström B, Glimskär A (2006) Estimating species richness and accumulation by modeling species occurrence and detectability. *Ecology* 87: 842–854.
35. Rota CT, Fletcher RJ, Evans JM, Hutto RL (2011) Does accounting for imperfect detection improve species distribution models? *Ecography* 34: 659–670.
36. Tyre AJ, Tenhumberg B, Field SA, Niejalke D, Parris K, et al. (2003) Improving precision and reducing bias in biological surveys: estimating false-negative error rates. *Ecol Appl* 13: 1790–1801.
37. Garrard GE, Bekessy SA, McCarthy MA, Wintle BA (2008) When have we looked hard enough? A novel method for setting minimum survey effort protocols for flora surveys. *Austral Ecol* 33: 986–998.
38. Guillera-Arroita G, Morgan BJT, Ridout MS, Linkie M (2011) Species occupancy modeling for detection data collected along a transect. *J Agr Biol Envir St* 16: 301–317.
39. White GC, Burnham KP, Otis DL, Anderson DR (1978) User's manual for Program CAPTURE. Logan, UT: Utah State University Press.
40. White GC, Burnham KP (1999) Program MARK: survival estimation from populations of marked animals. *Bird Study* 46 Supplement: 120–138.
41. Thomas L, Buckland ST, Rexstad EA, Laake JL, Strindberg S, et al. (2010) Distance software: design and analysis of distance sampling surveys for estimating population size. *J Appl Ecol* 47: 5–14.
42. Hines JE (2006) PRESENCE2—software to estimate patch occupancy and related parameters. Laurel, MD: USGS Patuxent Wildlife Research Center. Available: <http://www.mbr-pwrc.gov/software/presence.html>.
43. Hines JE, Boulenger T, Nichols JD, Sauer JR, Pollock KH (1999) COMDYN: Software to study the dynamics of animal communities using a capture-recapture approach. *Bird Study* 46: 209–217.
44. Choquet R, Rouan L, Pradel R (2009) Program E-Surge: a software application for fitting multilevel models. *Environ Ecol Stat* 3: 845–865.
45. Laake J, Johnson D, Conn P (2014) Marked: R code for mark-recapture analysis. R package version 1.1.6. Available: <http://cran.r-project.org/web/packages/marked/>.
46. Fiske I, Chandler R, Miller D, Royle A, Kéry M (2014) Unmarked: models for data from unmarked animals. R package version 0.10–4. Available: <http://cran.r-project.org/web/packages/unmarked/>.
47. Efford M (2014) Secr: spatially explicit capture-recapture. R package version 2.8.2. Available: <http://cran.r-project.org/web/packages/secr/>.
48. Clark JS (2007) Models for ecological data: an introduction. Princeton, NJ: Princeton University Press. 617 p.
49. Kéry M (2010) Introduction to WinBUGS for ecologists. Elsevier Academic Press, Burlington, MA. 320 p.
50. Kéry M, Schaub M (2012) Bayesian population analysis using WinBUGS. Waltham, MA: Elsevier Academic Press. 554 p.
51. Iknayan KJ, Tingley MW, Furnas BJ, Beissinger SR (2014) Detecting diversity: emerging methods to estimate species diversity. *Trends Ecol. Evol.* 29: 97–106.
52. Mazerolle, Bailey LL, Kendall WL, Royle JA, Converse SJ, et al. (2007) Making great leaps forward: accounting for detectability in herpetological field studies. *J Herpetol* 41: 672–689.
53. Plummer M (2003) JAGS: A program for analysis of Bayesian graphical models using Gibbs sampling. Proceedings of the 3rd International Workshop on Distributed Statistical Computing, 20–22 Mar 2003, Vienna, Austria: Technische Universität Wien.
54. R Development Core Team (2013) R: A language and environment for statistical computing. ISBN 3-900051-07-0. R Foundation for Statistical Computing, Vienna, Austria. Available: <http://www.R-project.org>.
55. Su Y, Yajima M (2014) R2jags: A package for running jags from R. R package version 0.04–03. Available: <http://cran.r-project.org/web/packages/R2jags/>.
56. Shefferson RP, Sandercock BK, Proper J, Beissinger SR (2001) Estimating dormancy and survival of a rare herbaceous perennial using mark-recapture models. *Ecology* 82: 145–156.
57. Chen G, Kéry M, Zhang J, Ma K (2009) Factors affecting detection probability in plant distribution studies. *J Ecol* 97: 1383–1389.
58. Alexander HM, Slade NA, Kettle WD, Pitman GL, Reed AW (2009) Detection, survival rates and dynamics of a cryptic plant, *Asclepias meadii*: applications of mark-recapture models to long-term monitoring studies. *J Ecol* 97: 267–276.
59. Alexander HM, Reed AW, Kettle WD, Slade NA, Bodbyl Roels SA, et al. (2012) Detection and plant monitoring programs: lessons from an intensive survey of *Asclepias meadii* with five observers. *PLoS One* 7: e52762.
60. Lele SR, Moreno M, Bayne E (2012) Dealing with detection error in site occupancy surveys: what can we do with a single survey? *J Plant Ecol* 5: 22–31.
61. Nichols JD (1992) Capture-recapture models. *BioScience* 42: 94–102.
62. Pollock KH, Nichols JD, Simons TR, Farnsworth GL, Bailey LL, et al. (2002) Large scale wildlife monitoring studies: statistical methods for design and analysis. *Environmetrics* 13: 105–119.
63. Kellner KF, Urban NA, Swihart RK (2013) Short-term responses of small mammals to timber harvest in the United States Central Hardwood Forest region. *J Wildl Manage* 77: 1650–1663.
64. Yackulic CB, Chandler R, Zipkin EF, Royle JA, Nichols JD, et al. (2013) Presence-only modelling using MAXENT: when can we trust the inferences? *Method Ecol Evol* 4: 236–243.
65. Phillips S, Anderson R, Schapire R (2006) Maximum entropy modeling of species geographic distributions. *Ecol Modell* 190: 231–259.
66. Dorazio RM (2012) Predicting the geographic distribution of a species from presence-only data subject to detection errors. *Biometrics* 68: 1303–1312.
67. Royle JA, Chandler RB, Yackulic C, Nichols JD (2012) Likelihood analysis of species occurrence probability from presence-only data for modelling species distributions. *Methods Ecol Evol* 3: 545–554.
68. Merow C, Silander JA Jr (2014) A comparison of Maxlike and Maxent for modelling species distributions. *Methods Ecol Evol* 5: 215–225.
69. Burnham KP (1981) Summarizing remarks: environmental influences. *Stud Avian Biol* 6: 324–325.
70. Thompson WL (2002) Towards reliable bird surveys: accounting for individuals present but not detected. *Auk* 119: 18–25.
71. Ellingson AR, Lukacs PM (2003) Methods for regional landbird monitoring: a reply to Hutto and Young. *Wildl Soc Bull* 31: 896–902.
72. MacKenzie DI, Kendall WL (2002) How should detection probabilities be incorporated into estimates of relative abundance? *Ecology* 83: 2387–2393.
73. Bart J, Droege S, Geissler P, Peterjohn B, Ralph CJ (2004) Density estimation in wildlife surveys. *Wildl Soc Bull* 32: 1242–1247.
74. Johnson DH (2008) In defense of indices: the case of bird surveys. *J Wildl Manage* 72: 857–868.
75. Rosenbaum PR (2005) Observational study. In: Everitt BS, Howell DC, editors. *Encyclopedia of Statistics in Behavioral Science*. Hoboken, NJ: John Wiley and Sons. 1451–1462.
76. Hutto RL, Young JS (2003). On the design of monitoring programs and the use of population indices: a reply to Ellingson and Lukacs. *Wildl Soc Bull* 31: 903–910.
77. Welsh AH, Lindenmayer DB, Donnelly CF (2013). Fitting and interpreting occupancy models. *PLoS One* 8: e52015.
78. Guillera-Arroita G, Lahoz-Monfort JJ, MacKenzie DI, Wintle BA, McCarthy MA (2014). Ignoring imperfect detection in biological surveys is dangerous: a response to 'fitting and interpreting occupancy models'. *PLoS One* 9: e9571.
79. MacKenzie DI, Nichols JD, Royle JA, Pollock KH, Bailey LL, et al. (2006) Occupancy estimation and modeling: inferring patterns and dynamics of species occurrence. New York: Academic Press. 324 p.
80. Cooper CB, Daniels SJ, Walters JR (2008) Can we improve estimates of juvenile dispersal distance and survival? *Ecology* 89: 3394–3361.
81. Moore JE, McEuen AB, Swihart RK, Contreras TA, Steele MA (2007) Determinants of seed removal distance by scatter hoarding rodents in deciduous forests. *Ecology* 88: 2529–2540.
82. Gilroy JJ, Virzi T, Boulton RL, Lockwood JL (2012) A new approach to the "apparent survival" problem: estimating true survival rates from mark-recapture studies. *Ecology* 93: 1509–1516.
83. Lichti NI, Steele MA, Zhang H, Swihart RK (2014) Mast species composition alters seed fate in North American rodent-dispersed hardwoods. *Ecology* 95: 1746–1758.
84. Boulanger J, Kendall KC, Stetz JB, Roon DA, Waits LP, et al. (2008) Multiple data sources improve DNA-based mark-recapture population estimates of grizzly bears. *Ecol Appl* 18: 577–589.
85. O'Connell AF, Nichols JD, Karanth KU (2011) Camera traps in animal ecology: methods and analyses. New York: Springer. 280 p.
86. Rees HC, Maddison B, Middleditch DJ, Patmore JRM, Gough KC (2014) The detection aquatic animal species using environmental DNA – a review of eDNA as a survey tool in ecology. doi:10.1111/1365-2664.12306.
